1 **The effect of smoking on the brain revealed by using electronic cigarettes with concurrent**  
2 **fMRI**

3 Matthew B Wall<sup>1,2,3</sup>, Alexander Mentink<sup>1,4</sup>, Georgina Lyons<sup>5</sup>, Oliwia S Kowalczyk<sup>5</sup>, Lysia Demetriou<sup>1,2</sup>  
4 and Rexford D Newbould<sup>1,2</sup>.

5 <sup>1</sup>Imanova Centre for Imaging Sciences, Burlington Danes Building, Hammersmith Hospital, Du Cane  
6 Road, London, W12 0NN, UK

7 <sup>2</sup>Division of Brain Sciences, Imperial College London, Hammersmith Campus, Du Cane Road, London,  
8 UK

9 <sup>3</sup>Clinical Psychopharmacology Unit, University College London, 1-19 Torrington Place, London WC1E  
10 7HB, UK.

11 <sup>4</sup>Leiden University, Rapenburg 70, 2311 EZ Leiden, The Netherlands

12 <sup>5</sup>Department of Psychology, Royal Holloway University of London, Egham, Surrey, TW20 0EX  
13

14 **Corresponding Author:**

15 Matthew Wall

16 Imanova Centre for Imaging Sciences

17 Burlington Danes Building

18 Hammersmith Hospital

19 Du Cane Road

20 London, W12 0NN

21 United Kingdom

22 [matt.wall@imanova.co.uk](mailto:matt.wall@imanova.co.uk)

23

24 **Financial disclosure**

25 There are no relevant financial disclosures.

26 **Conflict of Interest Statement**

27 None of the authors have any conflicts of interest to declare.

28 **Author Note**

29 OS Kowalczyk's current affiliation is: Centre for Neuroimaging Sciences, Institute of Psychiatry,  
30 Psychology and Neuroscience, Kings College London, London, UK.

31

32 **Abstract**

33 Cigarette addiction is driven partly by the physiological effects of nicotine, but also by the distinctive  
34 sensory and behavioural aspects of smoking, and understanding the neural effects of such processes  
35 is vital. There are many practical difficulties associated with subjects smoking in the modern  
36 neuroscientific laboratory environment, however electronic cigarettes obviate many of these issues,  
37 and provide a close simulation of smoking tobacco cigarettes. We have examined the neural effects  
38 of 'smoking' electronic cigarettes with concurrent functional Magnetic Resonance Imaging (fMRI).  
39 The results demonstrate the feasibility of using these devices in the MRI environment, and show  
40 brain activation in a network of cortical (motor cortex, insula, cingulate, amygdala) and sub-cortical  
41 (putamen, thalamus, globus pallidus, cerebellum) regions. Concomitant relative deactivations were  
42 seen in the ventral striatum and orbitofrontal cortex. These results reveal the brain processes  
43 involved in (simulated) smoking for the first time, and validate a novel approach to the study of  
44 smoking, and addiction more generally.

45

## 46 Introduction

47 Smoking is a major worldwide health problem, and current treatments for cigarette addiction are  
48 only partly effective. The behavioural and sensory aspects of smoking are thought to be important  
49 aspects of cigarette addiction, independently of the effects of nicotine (Rose, 2006; Balfour, 2004).  
50 Aspects of the multi-sensory (visual, tactile, olfactory, taste) experience of smoking can act as a  
51 powerful cue that reliably triggers craving and withdrawal symptoms in smoking addicts (Niaura et  
52 al., 1998). This is consistent with the incentive-sensitization theory of addiction (Robinson &  
53 Berridge, 1993; 2001), which proposes that neutral stimuli can promote drug-seeking behaviour  
54 through association with drug effects, and that this is mediated through sensitization of particular  
55 brain systems, principally the ventral striatum.

56 Research on the neural effects of smoking addiction has generally followed two largely independent  
57 paths. One has been concerned with the neurophysiological effects of nicotine and has generally  
58 used alternative routes of administration (intravenous, cutaneous patch, oral; e.g. Stein et al., 1998;  
59 Yamamoto Rohan & Goletiani, 2013; Cole et al., 2010). The second has used cigarette cues (usually  
60 images) to stimulate craving in (usually nicotine-abstinent) smokers (e.g. David et al., 2005; Janes et  
61 al., 2010). The former have provided usefully pure measures of the pharmacological effects of  
62 nicotine, and the latter have helped illuminate craving and drug-seeking mechanisms. However very  
63 few studies have investigated the neural effects of the most powerful cue associated with nicotine:  
64 the behavioural and multi-sensory repertoire of smoking itself. A small number of Positron Emission  
65 Tomography (PET) studies have involved subjects smoking while in a PET scanner. Berridge et al.  
66 (2010) used radio-labelled <sup>111</sup>C nicotine to investigate the pharmacokinetics of nicotine absorption,  
67 and Barrett et al (2004) investigated the hedonic properties of smoking with the use of <sup>111</sup>C raclopride  
68 to index dopamine release. The latter study showed that smoking-related changes in euphoria were  
69 related to dopamine release in the caudate and putamen, though not in the ventral striatum.  
70 Domino et al. (2013) used regular and denicotinized cigarettes to examine dopamine release; both  
71 showed effects on dopamine throughout the striatum, but the denicotinized cigarettes led to  
72 significantly less dopamine release. Cosgrove et al. (2014) also identified a potential sex difference in  
73 striatal dopamine release, with male subjects showing a more consistent and rapid response to  
74 smoking.

75 These PET studies are restricted, by the nature of the method, to examining a single  
76 neurotransmitter system. To date, there have been no investigations of active smoking using a more  
77 general neuroimaging method which could reveal effects across the entire brain, such as functional  
78 Magnetic Resonance Imaging (fMRI)<sup>1</sup>. This is likely because a host of practical, health, and safety  
79 issues largely preclude the use of traditional (i.e. combustible tobacco) cigarettes in the modern  
80 neuroscientific laboratory environment. For example: most MRI scanners are enclosed and  
81 restrictive, air capture/filtration systems would be required to deal with the smoke, and the  
82 procedure may require a naked flame. In addition local or national regulations may prohibit smoking  
83 within research institutions or hospital sites (e.g. Health Act 2006, in the United Kingdom).

---

<sup>1</sup> One group has published two papers (Lindsey et al, 2009; Lindsey, Bracken & MacLean, 2013) validating a MRI compatible system to enable smoking during functional imaging, however to the current authors' knowledge, they have never presented any fMRI data collected using the device.

84 Many of these issues may be obviated by the use of electronic cigarettes, or more accurately,  
85 Electronic Nicotine Delivery Systems (ENDS; Nutt et al., 2014). These are relatively novel consumer  
86 products that deliver nicotine, and are designed to provide a closer simulation of smoking tobacco  
87 cigarettes than previous nicotine-containing products. Use of ENDS does not involve combustion,  
88 and most produce relatively small amounts of vapour that evaporates within a few seconds.  
89 Evidence suggests that ENDS are effective at reducing withdrawal symptoms in nicotine-deprived  
90 smokers (Dawkins et al., 2012) and preliminary data show that ENDS may be effective at helping  
91 smokers quit, or reducing their smoking (Rahman et al., 2015; Bullen et al., 2013; although see  
92 Kalkhoran et al., 2016 for a contrary view). As such, they may hold great potential as a replacement  
93 for traditional cigarettes, and be a major benefit to public health (Nutt et al., 2014). As a novel  
94 technology, their effects on the brain, general health, and patterns of tobacco use is still largely  
95 unknown, and a recent editorial in Nature Neuroscience (2014) highlighted the urgent need for more  
96 research on ENDS.

97 We have explored the use of ENDS in combination with functional Magnetic Resonance Imaging  
98 (fMRI) in order to visualise brain activity related to active smoking, or more strictly, to the close  
99 simulation of active cigarette smoking that ENDS provide. To achieve this we first undertook  
100 extensive testing of commercially available ENDS to assess the devices for magnetic susceptibility  
101 and potential effects on MRI image quality. After successfully identifying a device that had minimal  
102 magnetic susceptibility and no discernible effects on image quality, 11 healthy smokers completed a  
103 scanning session that included active smoking fMRI tasks. In the first task subjects were instructed to  
104 'smoke' (i.e. inhale on the ENDS) by visual cues. In the second scan subjects received no cues, and  
105 were instructed to 'smoke' naturally, *ad libitum*.

106

107

## 108 **Methods**

### 109 *Equipment*

110 The ENDS devices were all widely commercially available at the time of testing. The five brands  
111 tested were: 'Njoy', 'Puritane', 'Vype', 'Nucig', and 'Jasper & Jasper'. See table 1 for more details on  
112 each device. These were all first generation, or 'cig-a-like' devices, with a form factor designed to  
113 mimic traditional cigarettes. All were of similar construction, consisting of an outer body, a lithium-  
114 polymer (LiPo) battery, a pressure-activated LED, a resistive heating element and nicotine-soaked  
115 wadding. LiPo batteries are commonly used in devices designed for the MRI environment, as they  
116 contain no internal metal components. All were operated by inhalation, and all incorporated a LED  
117 at the end of the device, intended to mimic the burning ember of a traditional cigarette. We  
118 exploited this feature by using a custom-built opto-electronic device to record the output of the LED  
119 at the end of the ENDS (see supplementary methods for details). This enabled effective and easy  
120 monitoring of task compliance, and recorded a time-series to be used in the analysis of the  
121 naturalistic smoking task (see below).

122

| <b>Brand</b>               | <b>Variety/model</b> | <b>Manufacturers stated nicotine content</b> | <b>Body construction</b>                      | <b>Length (mm)</b> | <b>Battery</b> |
|----------------------------|----------------------|----------------------------------------------|-----------------------------------------------|--------------------|----------------|
| <b>Njoy</b>                | Gold                 | 3% (by weight)                               | Plastic                                       | 84                 | LiPo, 70mAh    |
| <b>Puritane</b>            | Disposable           | 16mg/g                                       | Metallic                                      | 108                | LiPo, 240mAh   |
| <b>Vype</b>                | Bold                 | 18.6mg                                       | Plastic                                       | 85                 | LiPo, 280mAh   |
| <b>Nucig</b>               | N/A                  | 18mg                                         | Metallic                                      | 106                | LiPo, 200mAh   |
| <b>Jasper &amp; Jasper</b> | Nano disposable      | 16mg                                         | Plastic; metal housing around heating element | 88                 | LiPo, 170mAh   |

123 Table 1. Characteristics of the ENDS devices used in the initial testing phase.

124

### 125 *Initial Product Testing*

126 We tested five different brands of commercially available ENDS for their suitability for use in the MRI  
127 environment. None were modified or tampered with in any manner. All five ENDS were immersed in  
128 a 2% agarose solution with 160mM NaCl for conductivity. This phantom was imaged on a Siemens 3T  
129 Verio MRI scanner (Siemens Healthcare, Erlangen Germany). Imaging consisted of a gradient-echo  
130 sequence; TR = 300 ms, TE 1 = 5.19 ms, TE 2 = 7.65 ms, flip angle = 60°, 1.5 x 1.5 x 2 mm voxels, 35  
131 axial slices, bandwidth = 1520 Hz/pixel at two echo times: 1.93 and 4.39ms. A phase difference  
132 image between the two echo times was used to characterize the disturbance to the magnetic field  
133 (B<sub>0</sub>) from each ENDS. A spin-echo sequence was used to characterize disturbances to the applied RF  
134 (B<sub>1</sub>) field; TR = 5s, TE=8.5ms, 1.2 x 1.2 x 3.5mm voxels, 40 axial and coronal slices, bandwidth =  
135 800Hz/pixel.

136 Subsequently, one subject (Author MBW) completed a scan using each of the five brands in a similar  
137 manner to the subjects in the main experiment (described below). These scans used a dual-echo,

138 echo-planar imaging (EPI) sequence for BOLD contrast with 36 axial slices, aligned with the AC-PC  
139 axis (TR = 2000 ms, TE1 = 13 ms, TE2 = 31 ms flip angle = 80°, 3 mm isotropic voxels, parallel imaging  
140 factor = 2, bandwidth = 2298 Hz/pixel). The ENDS devices were therefore assessed for general  
141 magnetic susceptibility, and in particular for their potential to generate artefacts when used by a  
142 subject during a BOLD EPI acquisition.

#### 143 *Subjects*

144 Subjects were 11 (3 females) daily or semi-regular social smokers, who were in good general health.  
145 One (male) subject was subsequently excluded from analysis because of excessive (> 5 mm) head  
146 movement and failure to comply with the task, which left a final group of 10 (mean age of 29.1  
147 years; SD = 5.91). The mean number of cigarettes smoked daily for this group was 10.1 (SD = 5.6).  
148 Subjects were not asked to abstain from smoking on the day of the scan, and were therefore not in a  
149 nicotine-deprived state.

#### 150 *Tasks and scanning procedure*

151 Data were acquired on a Siemens 3T Magnetom Trio MRI scanner (Siemens Healthcare, Erlangen,  
152 Germany), equipped with a 32-channel phased-array head coil. Subjects held the ENDS in their right-  
153 hand, with the right elbow cushioned so that they could comfortably hold it on their chest, close to  
154 their mouth, in order to minimise the hand movement required on each trial. Subjects could view a  
155 back-projected image on a screen in the rear of the scanner bore via a mirror mounted on the head-  
156 coil. They were instructed to try to avoid looking down (e.g. along the scanner bore, towards the  
157 ENDS) as they inhaled, in order to counteract the natural tendency to nod the head forward slightly  
158 when looking down.

159 Based on the results of the initial testing (see results section) the 'Njoy' device was selected as a  
160 good candidate device for use in the main experiment. A fresh ENDS was used for each subject, and  
161 the only modification made was the removal of the plastic end cap covering the LED. This was  
162 required in order to provide higher light output and a better signal for the opto-electronic recording  
163 device. The optical fibre was attached to the end of the ENDS by a rubber connector, and remained  
164 in place throughout the scan. The output of the device was recorded by a standard analogue-to-  
165 digital recording system (PowerLab 8/35, AD Instruments, Oxford UK), and physiological parameters  
166 (respiration via a respiratory belt around the subjects' chest, and cardiac data via a pulse-oximeter  
167 on the index finger of the left hand) were recorded on the same system.

168 At the beginning of the scan session high-resolution T1-weighted anatomical images were acquired  
169 using a magnetization prepared rapid gradient echo (MPRAGE) sequence with parameters from the  
170 Alzheimer's Disease Research Network (ADNI; 160 slices x 240 x 256, TR = 2300 ms, TE = 2.98 ms, flip  
171 angle = 9°, 1 mm isotropic voxels, bandwidth = 240Hz/pixel, parallel imaging factor = 2; Jack et al.,  
172 2008) along with B0 field-map images (sequence as described above). Subjects then completed two  
173 functional scans (sequence as described above) of ten minutes duration each. The first was the cued  
174 smoking task that consisted of 20 trials with inter-trial intervals that varied randomly between 20,  
175 25, and 30 seconds (mean = 25s). On each trial, a three second countdown (3, 2, 1) was displayed in  
176 the centre of the screen, followed by the word 'SMOKE', displayed for two seconds. A fixation cross  
177 was present throughout the inter-trial interval. Participants were instructed to time their inhalations  
178 on the ENDS to coincide with the 'SMOKE' cue. The second task was the naturalistic smoking task,

179 where there were no visual cues, and subjects were instructed to smoke ‘naturally’ throughout the  
180 ten minute scan.

### 181 *Data analysis*

182 All analysis was conducted using FSL (Smith et al., 2004; Jenkinson et al., 2012) version 5.0. Pre-  
183 processing of the functional data involved removal of non-brain tissue, head-motion correction,  
184 spatial smoothing with a 6mm full-width-half-maximum Gaussian kernel, and high-pass temporal  
185 filtering with a cut-off of 100s. Additional correction for the effects of head-motion used the ICA-  
186 AROMA tool (ICA-based Automatic Removal Of Motion Artefacts; Pruim et al., 2015; Pruim, Mennes,  
187 Buitelaar, & Beckmann, 2015). For the cued smoking task data, first-level statistical (General Linear  
188 Model) models were created which contained a single regressor of interest. This time-series  
189 modelled two-second events defined by the occurrence of the smoking cue, convolved with a  
190 gamma function in order to produce a standard model of the haemodynamic response function. The  
191 first temporal derivative of this time-series was also included in the model. Statistical maps resulting  
192 from these analyses were coregistered to each subjects’ skull-stripped T1 anatomical image, and  
193 then to an image in standard stereotactic space (the MNI152 template provided with FSL). Analysis  
194 at the second (group) level computed a simple mean across subjects for the regressor of interest  
195 using FSL’s FLAME-1 model, and the results were thresholded at  $Z = 2.3$  ( $p < 0.05$ , cluster-corrected  
196 for multiple comparisons).

197 For the naturalistic smoking task data, ‘smoking’ events were defined based on the recorded output  
198 of the opto-electronic device. This enabled a custom regressor of smoking events to be produced for  
199 each subject, using custom written MatLab (MathWorks Ltd.) code. The temporal derivative of the  
200 raw time-series was computed, and the peaks and troughs of the derivative time-series were used to  
201 define the start and end of each smoking event. In all other respects analysis of this task was  
202 identical to the cued smoking task.

203 Because of the established effects of physiological parameters on fMRI data (e.g. Birn et al., 2006;  
204 Harvey et al., 2008; Diukova et al., 2012), and because these tasks crucially depend on timed  
205 inhalations, analysis models of both sets of data also included physiological noise regressors. The  
206 recorded physiological (cardiac and respiratory) data was processed using the Physiological Noise  
207 Modelling (PNM) toolbox included with FSL (Brooks et al., 2008) and an additional 12 Fourier-  
208 expanded regressors were created to model cardiac and respiratory function. Additional analyses  
209 were conducted without the physiological noise regressors, in order to examine the effect of the  
210 noise modelling procedure.

211

212

## 213 **Results**

### 214 *ENDS MR compatibility*

215 None of the five ENDS contained ferromagnetic components such as might experience torque inside  
216 the magnetic field, however, two were found to have metallic bodies upon disassembly (see table 1).  
217 While no large torques would be expected, eddy currents will be induced in the conductive body  
218 from the MRI's RF activity (Schenk, 1996). These eddy currents generate unwanted counter-acting  
219 magnetic fields as seen in supplementary figure 2, and may pose a safety risk from heating of the  
220 conductor. Further, most metals have a magnetic susceptibility,  $\chi$ , far enough ( $> 10^{-5}$ ) from the  $\chi$  of  
221 water that image distortion is expected. While an aluminium body would have a modest effect,  
222 nickel or stainless steel would create large image distortions. If the ENDS could be used parallel to  
223 the main magnetic field  $B_0$ , the cylinder-shaped body would not perturb  $B_0$  outside the ENDS.  
224 However, when used normally the ENDS would be transverse to the main magnetic field; resulting in  
225 a dipole perturbation in cylindrical coordinates ( $\rho, \phi$ ) of  $\Delta B_z = \frac{\Delta\chi B_0}{8\rho^2} (2\cos^2\phi - 1)$ . These  
226 characteristic dipole patterns are illustrated in supplementary figure 1.

227 The MRI environment had no apparent effect on the operation of any of the tested ENDS devices.  
228 The magnetic susceptibility artefacts produced by the different devices varied widely (see  
229 supplementary figure 2 for high and low-susceptibility examples). Unsurprisingly, the larger devices  
230 with metal construction produced the most detrimental effects, but even the smaller devices  
231 produced some areas of signal loss on the MRI phantom images. However, the smaller devices  
232 produced no obvious image artefacts in the test with a human subject, suggesting that they would  
233 be suitable for use in the main experiment.

234

### 235 *Task Results*

236 In the main study, figure 1 illustrates the resulting pattern of brain activity that occurred in the cued-  
237 smoking task, time-locked to the smoking events. Large activation clusters are seen in the dorsal  
238 motor cortex in the left hemisphere, consistent with movements of the right hand during smoking  
239 trials. More lateral motor activity likely represents oro-facial movements on smoking trials. Other  
240 cortical regions strongly activated were the mid-insula, the amygdala, and the (dorsal) anterior  
241 cingulate gyrus. Strong activation of sub-cortical regions is also seen, principally in the thalamus,  
242 globus pallidus, and putamen. Relative deactivations associated with smoking events were also seen  
243 in a large region encompassing parts of the ventral striatum (nucleus accumbens and ventral  
244 caudate) and extending forward into orbitofrontal cortex. An additional area of deactivation was  
245 also seen in more dorsal frontal cortex.



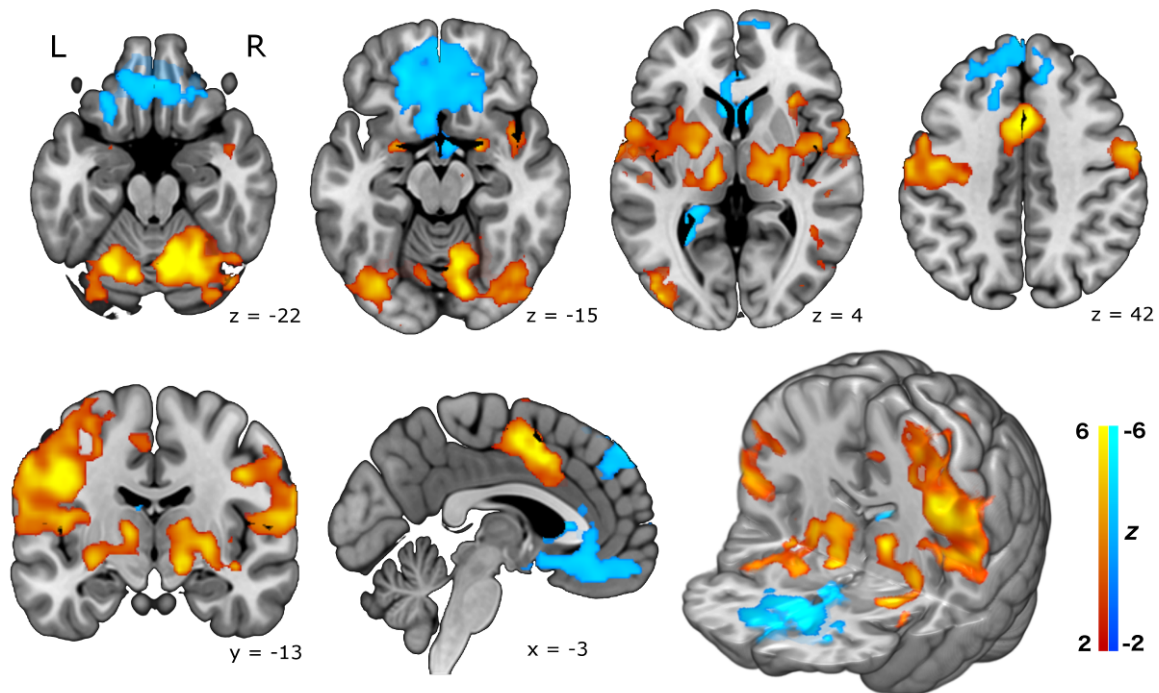

246

247 Figure 1. Brain activation in the cued smoking experiment, from a group mean analysis of 10 healthy  
248 smokers, including physiological noise modelling. Top row: axial slices. Bottom row: (from left)  
249 coronal slice, sagittal slice, and a 3D rendered image. Increased activity is seen in the amygdala,  
250 cerebellum, thalamus, putamen, globus pallidus, insula, cingulate gyrus and motor cortex. Reduced  
251 activity is seen in the ventral striatum, orbitofrontal cortex, and dorso-medial frontal regions.  
252 Statistical maps are shown thresholded at  $z > 2.3$ ,  $p < 0.05$  (cluster corrected for multiple  
253 comparisons) and neurological convention is used (L=Left, R=Right). Background anatomical image is a  
254 high-resolution version of the MNI152 T1 anatomical template.

255 Brain activity in the naturalistic smoking experiment showed a similar pattern, though less strongly,  
256 and less widespread, with significant clusters in motor cortex, thalamus, globus pallidus and  
257 putamen during smoking events. Relative deactivations were restricted to the dorsal frontal region  
258 in this analysis (see figure 2).

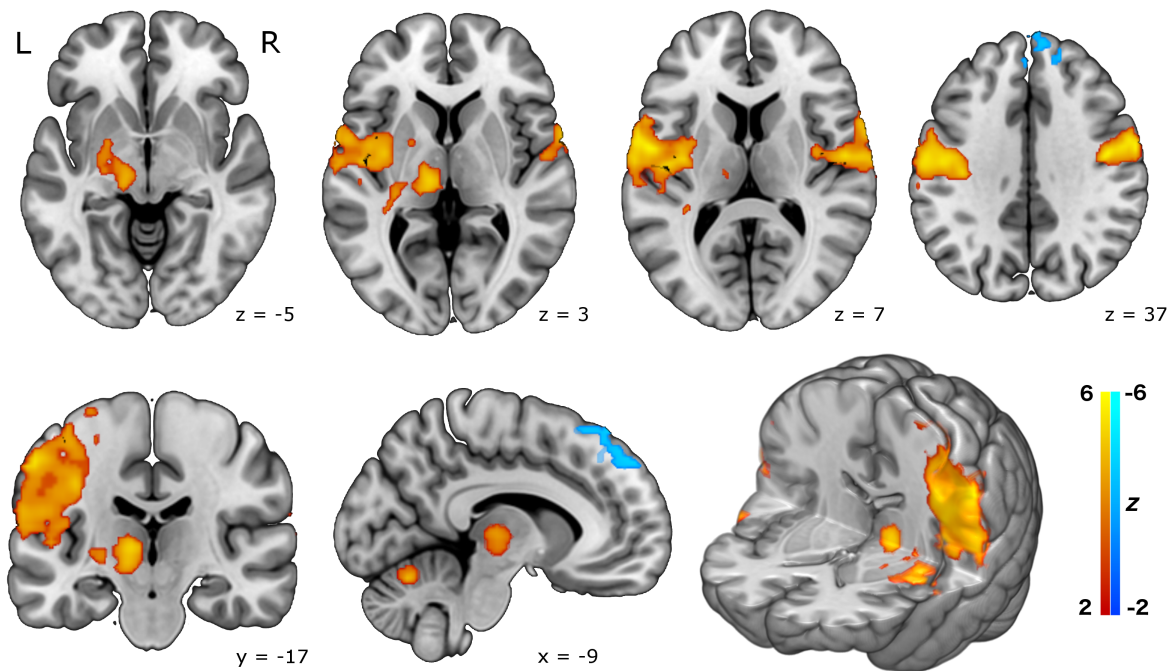

259

260

261

262

263

264

265

266

Figure 2. Brain activation in the naturalistic smoking experiment, from a group mean analysis of 10 healthy smokers, including physiological noise modelling. Top row: axial slices. Bottom row: (from left) coronal slice, sagittal slice, and a 3D rendered image. The pattern of activation is broadly similar to that seen in the cued experiment, but somewhat less robust, and less widespread. Statistical maps are shown thresholded at  $z > 2.3$ ,  $p < 0.05$  (cluster corrected for multiple comparisons) and neurological convention is used (L=Left, R=Right). Background anatomical image is a high-resolution version of the MNI152 T1 anatomical template.

267

Additional analyses of both data-sets that did not include the physiological noise modelling regressors produced a highly similar set of results (see supplementary figure 3), suggesting that physiological effects are not a significant confound in the data.

270

271

| <b>Task/Contrast</b>                        | <b>Region</b>              | <b>Right Hemisphere</b> | <b>Left Hemisphere</b> |
|---------------------------------------------|----------------------------|-------------------------|------------------------|
| <b>Cued smoking (activations)</b>           | Cerebellum VI              | 24 -60 -26              | -26 -64 -24            |
|                                             | Amygdala                   | 22 0 -16                | -24 0 -16              |
|                                             | Insula                     | 40 8 -10                | -38 6 -6               |
|                                             | Putamen                    | 24 0 -6                 | -28 -4 -6              |
|                                             | Pallidum                   | 24 -10 4                | -24 -6 0               |
|                                             | Thalamus                   | 14 -14 2                | -12 -20 2              |
|                                             | Precentral gyrus (dorsal)  | 50 -4 52                | -46 -6 52              |
|                                             | Precentral gyrus (ventral) | 54 -4 26                | -50 -8 26              |
|                                             | Cingulate gyrus            | 2 12 42                 | -2 10 42               |
|                                             | Fusiform gyrus             | 40 -72 -14              | -36 -76 -14            |
| <b>Cued smoking (deactivations)</b>         | Medial frontal cortex      | 6 38 -16                | -10 34 -12             |
|                                             | Nucleus accumbens          | 4 10 -10                | -8 8 -12               |
|                                             | Caudate                    | 8 18 6                  | -8 16 6                |
|                                             | Frontal pole               | 14 48 30                | -14 48 28              |
| <b>Naturalistic smoking (activations)</b>   | Cerebellum VI              | 16 -64 -22              | -16 -66 -20            |
|                                             | Insula                     | -                       | -40 -4 0               |
|                                             | Putamen                    | -                       | -24 4 2                |
|                                             | Pallidum                   | -                       | -24 -6 -4              |
|                                             | Thalamus                   | -                       | -12 -20 0              |
|                                             | Precentral gyrus (dorsal)  | 52 -4 42                | -50 -12 42             |
|                                             | Precentral gyrus (ventral) | 60 0 22                 | -56 -4 22              |
| <b>Naturalistic smoking (deactivations)</b> | Frontal pole               | 16 38 46                | -6 48 44               |

272

273

274

Table 2. Coordinates of the approximate centre of activation clusters within anatomical regions for all experiments and contrasts. Coordinates are in MNI space.

275

## 276 Discussion

277 These data demonstrate the feasibility of using ENDS in the MRI environment, and reveal the neural  
278 correlates of (simulated) smoking for the first time. A wide network of activated areas included  
279 cortical (motor cortex, insula, cingulate, amygdala) and sub-cortical (thalamus, putamen, globus  
280 pallidus, cerebellum) regions, with corresponding significant deactivations in ventral striatum and  
281 orbitofrontal cortex.

282 The most prominent result is the activation in left motor cortex which can plausibly be attributed to  
283 hand and oro-facial movements associated with the smoking task. The activation clusters in the right  
284 cerebellum are also most plausibly related to the motor components of the task. While certainly part  
285 of the behavioural repertoire of smoking, these results are unsurprising, and will not be discussed  
286 further. Of more interest are the results in other regions, particularly the thalamus and striatum.  
287 Previous work has identified differences in dopamine release in the caudate and putamen in  
288 smokers vs. non-smokers (Takahashi et al., 2008), and the striatum is widely considered to be a key  
289 set of brain structures that support addiction (Volkow et al., 2007; Robbins & Everitt, 2002; Everitt &  
290 Robbins, 2005), with interactions between nicotine and the mesolimbic dopamine system also well-  
291 established (for a review see Pierce & Kumaresan, 2006). Intriguingly, parts of the ventral striatum  
292 (nucleus accumbens, and ventral caudate) appear to show a relative signal *decrease* in response to  
293 smoking in this experiment, as well as a large region in the orbitofrontal cortex. One possible  
294 explanation for these regions of relative deactivation may be the shift from ventral to dorsal  
295 striatum that occurs as drug use becomes habitual and compulsive (Everitt & Robbins, 2013), and  
296 the finding that dysfunctional inhibitory mechanisms in the prefrontal cortex also play a role in  
297 addictive behaviour (Everitt & Robbins, 2013; Goldstein & Volkow, 2011). Janes et al. (2014) also  
298 recently showed that the connectivity of the orbitofrontal cortex was highly related to subjective  
299 craving measures. The current findings are consistent with the established role of the ventral  
300 striatum and frontal cortex in drug craving, and further suggest that activity in these areas is actually  
301 reduced during active drug consumption, with the rewarding aspect of consumption mediated by  
302 more dorsal striatal regions. The results are also highly consistent with the previous PET study by  
303 Berridge et al. (2010) which showed smoking-related euphoria was related to dopamine release in  
304 the dorsal, but not ventral, striatum. The general activation pattern involving the brain's reward  
305 circuitry also implies that use of ENDS may have a similar rewarding effect as traditional cigarettes.

306 It is important to note that the current data say relatively little about the neural effects of nicotine.  
307 Although the ENDS used contained nicotine, the modelling of the brain response was time-locked to  
308 the action of smoking. Nicotine (absorbed into the blood through the vapour produced by the ENDS)  
309 is likely to only enter the brain between 5 and 20 seconds after each inhalation (Berridge et al.,  
310 2010), and modelling this effect within a conventional fMRI design would be difficult, since the  
311 timing of the nicotine 'hit' after each trial is somewhat uncertain. There is a large literature on  
312 nicotine and its pure pharmacological effects are relatively well understood (e.g. Stein et al., 1998;  
313 Yamamoto, Rohan & Goletiani, 2013). The current data stand as complementary to this literature,  
314 and provide a visualisation of brain processes related to the consumption of nicotine in a relatively  
315 naturalistic manner.

316 Results from the cued task were robust, while results from the naturalistic task were noticeably  
317 muted in comparison. There are several plausible explanations for this finding. Firstly in the

318 naturalistic study the number of smoking events varied across subjects (mean = 28.8, SD = 15.4) and  
319 this produced more between-subject variance in the data. Secondly, the timing of events in the  
320 naturalistic study was determined by the subjects, and therefore did not necessarily conform to  
321 optimal principles of fMRI experimental design (Friston et al., 1999; Dale, 1999); this could affect the  
322 signal-detection power of the experiment. Thirdly, the naturalistic scan was always conducted after  
323 the cued scan and subjects were possibly nicotine-sated in the latter scan, leading to less activation  
324 in the striatal (i.e. more reward-related) regions. Fourth, the task demands of each scan were quite  
325 different, with one requiring active focus and attention on the external cue task, while the other did  
326 not. One other aspect of the design deserves comment, which is the use of a purely baseline control  
327 condition in both tasks. In this initial study we were concerned with demonstrating the technical  
328 feasibility of using ENDS in this way, but also with visualising the neural correlates of the entire  
329 behavioural and sensory repertoire of smoking. The comparison of 'smoking' with 'not smoking'  
330 (that is, a resting baseline) provides this. Future work may be concerned with dissecting the various  
331 components of the response using appropriate control conditions. For instance, sham-smoking with  
332 a non-functional device may be a useful control condition for subtracting out the motor aspects of  
333 the response.

334 Future work using similar methods may also be focussed on optimising the equipment, procedure,  
335 and analysis strategy. The market for electronic cigarettes has shown explosive growth in recent  
336 years, and new products are being launched almost on a daily basis. The first generation 'cig-a-like'  
337 devices used here are designed to mimic traditional cigarettes, and this visual mimicry may be  
338 helpful in reducing withdrawal symptoms (Dawkins et al., 2015). However the second or third  
339 generation devices currently on the market appear to be more effective at delivering nicotine, and  
340 thereby reducing craving and withdrawal symptoms (Lechner et al., 2015; Dawkins, Kimber,  
341 Puwanesarasa & Soar, 2015). Unfortunately these devices tend to be larger, heavier, and  
342 incorporate more metallic components, making them unsuitable for use in the MRI environment  
343 without substantial modification. The smaller, first generation devices (particularly those that have a  
344 plastic construction and use non-magnetic Lithium polymer or 'LiPo' batteries) are probably the best  
345 current option for this kind of work. The other useful feature of these devices is the end-mounted  
346 LED, which allows for easy monitoring of task compliance, with the simple device used here.  
347 Alternative analysis strategies for studies of this type may be focussed on visualising the trial-by-trial  
348 effect of nicotine on the brain, or the cumulative effect over the course of the experiment. This  
349 would be difficult because of the reasons mentioned above, but is perhaps feasible using a more  
350 flexible statistical model, or model-free analysis approaches such as Independent Components  
351 Analysis (ICA).

352 This demonstration of the feasibility of using ENDS in the MRI environment has served to validate an  
353 entirely novel approach to the study of cigarette dependence, and the more general brain  
354 mechanisms of addiction. We have also revealed for the first time the full neural effects of active  
355 (simulated) smoking, which includes activation in a network of cortical (motor, insula, cingulate,  
356 amygdala) and sub-cortical (putamen, thalamus) regions, with relative deactivation in ventral  
357 striatum and orbitofrontal cortex. Together with previous work on nicotine, and cue-reactivity in  
358 smokers, these findings provide a more complete picture of the neural effects associated with  
359 cigarette smoking, and addiction in general.

360

361 **References**

- 362 Balfour, D. (2004). The neurobiology of tobacco dependence: A preclinical perspective on the role of  
363 the dopamine projections to the nucleus. *Nicotine & Tobacco Research*, 6(6), 899–912.  
364 doi:10.1080/14622200412331324965
- 365 Berridge, M. S., Apana, S. M., Nagano, K. K., Berridge, C. E., Leisure, G. P., & Boswell, M. V. (2010).  
366 Smoking produces rapid rise of [11C]nicotine in human brain. *Psychopharmacology*, 209(4), 383–94.  
367 doi:10.1007/s00213-010-1809-8
- 368 Birn RM, Diamond JB, Smith MA, Bandettini PA. (2006) Separating respiratory-variation-related  
369 fluctuations from neuronal-activity-related fluctuations in fMRI. *Neuroimage*. 31:1536-1548.
- 370 Bullen, C., Howe, C., Laugesen, M., McRobbie, H., Parag, V., Williman, J., & Walker, N. (2013).  
371 Electronic cigarettes for smoking cessation: a randomised controlled trial. *The Lancet*, 382(9905),  
372 1629-1637.
- 373 Brooks, J. C. W., Beckmann, C. F., Miller, K. L., Wise, R. G., Porro, C. A., Tracey, I., & Jenkinson, M.  
374 (2008). Physiological noise modelling for spinal functional magnetic resonance imaging studies.  
375 *NeuroImage*, 39(2), 680–692. doi:10.1016/j.neuroimage.2007.09.018
- 376 Cole, D. M., Beckmann, C. F., Long, C. J., Matthews, P. M., Durcan, M. J., & Beaver, J. D. (2010).  
377 Nicotine replacement in abstinent smokers improves cognitive withdrawal symptoms with  
378 modulation of resting brain network dynamics. *NeuroImage*, 52(2), 590–9.  
379 doi:10.1016/j.neuroimage.2010.04.251
- 380 Cosgrove, K. P., Wang, S., Kim, S. J., McGovern, E., Nabulsi, N., Gao, H., ... & Morris, E. D. (2014).  
381 Sex differences in the brain's dopamine signature of cigarette smoking. *Journal of*  
382 *Neuroscience*, 34(50), 16851-16855.
- 383 Dale, A. M. (1999). Optimal experimental design for event-related fMRI. *Human Brain Mapping*, 8(2-  
384 3), 109–14. doi:10.1002/(SICI)1097-0193(1999)8:2/3<109::AID-HBM7>3.0.CO;2-W
- 385 David, S. P., Munafò, M. R., Johansen-Berg, H., Smith, S. M., Rogers, R. D., Matthews, P. M., &  
386 Walton, R. T. (2005). Ventral striatum/nucleus accumbens activation to smoking-related pictorial  
387 cues in smokers and nonsmokers: a functional magnetic resonance imaging study. *Biological*  
388 *Psychiatry*, 58(6), 488–94. doi:10.1016/j.biopsych.2005.04.028
- 389 Dawkins, L., Kimber, C., Puwanesarasa, Y., & Soar, K. (2015). First-versus second-generation  
390 electronic cigarettes: predictors of choice and effects on urge to smoke and withdrawal  
391 symptoms. *Addiction*, 110(4), 669-677.
- 392 Dawkins, L., Munafò, M., Christoforou, G., Olumegbon, N., & Soar, K. (2016). The effects of e-  
393 cigarette visual appearance on craving and withdrawal symptoms in abstinent smokers. *Psychology*  
394 *of Addictive Behaviors*, 30(1), 101.
- 395 Dawkins, L., Turner, J., Hasna, S., & Soar, K. (2012). The electronic-cigarette: effects on desire to  
396 smoke, withdrawal symptoms and cognition. *Addictive behaviors*, 37(8), 970-973.

- 397 Diukova, A., Ware, J., Smith, J. E., Evans, C. J., Murphy, K., Rogers, P. J., & Wise, R. G. (2012).  
398 Separating neural and vascular effects of caffeine using simultaneous EEG-fMRI: differential effects  
399 of caffeine on cognitive and sensorimotor brain responses. *NeuroImage*, *62*(1), 239–49.  
400 doi:10.1016/j.neuroimage.2012.04.041
- 401 Domino, E. F., Ni, L., Domino, J. S., Yang, W., Evans, C., Guthrie, S., ... & Zubieta, J. K. (2013).  
402 Denicotinized versus average nicotine tobacco cigarette smoking differentially releases striatal  
403 dopamine. *Nicotine & Tobacco Research*, *15*(1), 11-21.
- 404 Everitt, B. J., & Robbins, T. W. (2005). Neural systems of reinforcement for drug addiction: from  
405 actions to habits to compulsion. *Nature neuroscience*, *8*(11), 1481-1489.
- 406 Everitt, B. J., & Robbins, T. W. (2013). From the ventral to the dorsal striatum: devolving views of  
407 their roles in drug addiction. *Neuroscience & Biobehavioral Reviews*, *37*(9), 1946-1954.
- 408 Friston, K. J., Zarahn, E. O. R. N. A., Josephs, O., Henson, R. N. A., & Dale, A. M. (1999). Stochastic  
409 designs in event-related fMRI. *Neuroimage*, *10*(5), 607-619.
- 410 Goldstein, R. Z., & Volkow, N. D. (2011). Dysfunction of the prefrontal cortex in addiction:  
411 neuroimaging findings and clinical implications. *Nature Reviews Neuroscience*, *12*(11), 652-669.
- 412 Harvey, A. K., Pattinson, K. T. S., Brooks, J. C. W., Mayhew, S. D., Jenkinson, M., & Wise, R. G. (2008).  
413 Brainstem functional magnetic resonance imaging: disentangling signal from physiological noise.  
414 *Journal of Magnetic Resonance Imaging*, *28*(6), 1337–44. doi:10.1002/jmri.21623
- 415 *Health Act, 2006, Chapter 1*. Available at:  
416 [http://www.legislation.gov.uk/ukpga/2006/28/pdfs/ukpga\\_20060028\\_en.pdf](http://www.legislation.gov.uk/ukpga/2006/28/pdfs/ukpga_20060028_en.pdf) (Accessed 22  
417 November, 2016).
- 418 Jack, C. R., Bernstein, M. A., Fox, N. C., Thompson, P., Alexander, G., Harvey, D., ... & Dale, A. M.  
419 (2008). The Alzheimer's disease neuroimaging initiative (ADNI): MRI methods. *Journal of Magnetic  
420 Resonance Imaging*, *27*(4), 685-691.
- 421 Janes, A. C., Farmer, S., Frederick, B. D., Nickerson, L. D., & Lukas, S. E. (2014). An increase in tobacco  
422 craving is associated with enhanced medial prefrontal cortex network coupling. *PLoS ONE*, *9*(2), 1–5.  
423 doi:10.1371/journal.pone.0088228
- 424 Janes, A. C., Pizzagalli, D. A., Richardt, S., de B Frederick, B., Holmes, A. J., Sousa, J., ... & Kaufman, M.  
425 J. (2010). Neural substrates of attentional bias for smoking-related cues: an FMRI  
426 study. *Neuropsychopharmacology*, *35*(12), 2339-2345.
- 427 Jenkinson, M., Beckmann, C. F., Behrens, T. E. J., Woolrich, M. W., & Smith, S. M. (2012). Fsl.  
428 *NeuroImage*, *62*(2), 782–90. doi:10.1016/j.neuroimage.2011.09.015
- 429 Kalkhoran, S., & Glantz, S. A. (2016). E-cigarettes and smoking cessation in real-world and clinical  
430 settings: a systematic review and meta-analysis. *The Lancet Respiratory Medicine*, *4*(2), 116-128.

- 431 Lechner, W. V., Meier, E., Wiener, J. L., Grant, D. M., Gilmore, J., Judah, M. R., ... & Wagener, T. L.  
432 (2015). The comparative efficacy of first-versus second-generation electronic cigarettes in reducing  
433 symptoms of nicotine withdrawal. *Addiction*, *110*(5), 862-867.
- 434 Lindsey, K., Bracken, B., & MacLean, R. (2013). Nicotine content and abstinence state have different  
435 effects on subjective ratings of positive versus negative reinforcement from smoking. *Pharmacology*  
436 *...*, *103*(4), 710–716. doi:10.1016/j.pbb.2012.11.012.Nicotine
- 437 Lindsey, K. P., Lukas, S. E., MacLean, R. R., Ryan, E. T., Reed, K. R., & Frederick, B. deB. (2009). Design  
438 and validation of an improved nonferrous smoking device for self-administration of smoked drugs  
439 with concurrent fMRI neuroimaging. *Clinical EEG and Neuroscience : Official Journal of the EEG and*  
440 *Clinical Neuroscience Society (ENCs)*, *40*(1), 21–30.
- 441 Nature Neuroscience (Editorial; 2014). Clearing the smoke. *Nature Neuroscience*, *17*(8), 1013.  
442 doi:10.1038/nn.3777
- 443 Niaura, R., Shadel, W. G., Abrams, D. B., Monti, P. M., Rohsenow, D. J., & Sirota, A. (1998). Individual  
444 differences in cue reactivity among smokers trying to quit: effects of gender and cue type. *Addictive*  
445 *behaviors*, *23*(2), 209-224.
- 446 Pierce, R. C., & Kumaresan, V. (2006). The mesolimbic dopamine system: The final common pathway  
447 for the reinforcing effect of drugs of abuse? *Neuroscience and Biobehavioral Reviews*, *30*(2), 215–  
448 238. doi:10.1016/j.neubiorev.2005.04.016
- 449 Pruim, R. H. R., Mennes, M., van Rooij, D., Llera, A., Buitelaar, J. K., & Beckmann, C. F. (2015). ICA-  
450 AROMA: A robust ICA-based strategy for removing motion artifacts from fMRI data. *NeuroImage*,  
451 *112*, 267–277. <http://doi.org/10.1016/j.neuroimage.2015.02.064>
- 452 Pruim, R. H. R., Mennes, M., Buitelaar, J. K., & Beckmann, C. F. (2015). Evaluation of ICA-AROMA and  
453 alternative strategies for motion artifact removal in resting state fMRI. *NeuroImage*, *112*, 278–287.  
454 <http://doi.org/10.1016/j.neuroimage.2015.02.063>
- 455 Rahman, M. A., Hann, N., Wilson, A., Mnatzaganian, G., & Worrall-Carter, L. (2015). E-cigarettes and  
456 smoking cessation: evidence from a systematic review and meta-analysis. *PloS one*, *10*(3), e0122544.
- 457 Robbins, T. W., & Everitt, B. J. (2002). Limbic-striatal memory systems and drug  
458 addiction. *Neurobiology of learning and memory*, *78*(3), 625-636.
- 459 Robinson, T., & Berridge, K. (1993). The neural basis of drug craving: an incentive-sensitization  
460 theory of addiction. *Brain Research Reviews*, *8*, 247–291.
- 461 Robinson, T. E., & Berridge, K. C. (2001). Incentive-sensitization and addiction. *Addiction*, *96*(1), 103–  
462 14. doi:10.1080/09652140020016996
- 463 Rose, J. E. (2006). Nicotine and nonnicotine factors in cigarette addiction. *Psychopharmacology*,  
464 *184*(3-4), 274–85. doi:10.1007/s00213-005-0250-x
- 465 Schenck, J. F. (1996). The role of magnetic susceptibility in magnetic resonance imaging: MRI  
466 magnetic compatibility of the first and second kinds. *Medical physics*, *23*(6), 815-850.



467 Smith, S. M., Jenkinson, M., Woolrich, M. W., Beckmann, C. F., Behrens, T. E. J., Johansen-Berg, H., ...  
468 others. (2004). Advances in functional and structural MR image analysis and implementation as FSL.  
469 *Neuroimage*, 23, S208–S219.

470 Stein, E a, J Pankiewicz, H H Harsch, J K Cho, S a Fuller, R G Hoffmann, M Hawkins, S M Rao, P a  
471 Bandettini, and a S Bloom. 1998. "Nicotine-Induced Limbic Cortical Activation in the Human Brain: A  
472 Functional MRI Study." *The American Journal of Psychiatry* 155 (8): 1009–15.

473 Takahashi, Hidehiko, Yota Fujimura, Mika Hayashi, Harumasa Takano, Motoichiro Kato, Yoshiro  
474 Okubo, Iwao Kanno, Hiroshi Ito, and Tetsuya Suhara. 2008. "Enhanced Dopamine Release by  
475 Nicotine in Cigarette Smokers: A Double-Blind, Randomized, Placebo-Controlled Pilot Study." *The*  
476 *International Journal of Neuropsychopharmacology* 11 (3): 413–17.  
477 doi:10.1017/S1461145707008103.

478 Volkow, N. D., Fowler, J. S., Wang, G. J., Swanson, J. M., & Telang, F. (2007). Dopamine in drug abuse  
479 and addiction: results of imaging studies and treatment implications. *Archives of neurology*, 64(11),  
480 1575-1579.

481 Yamamoto, R. T., Rohan, M. L., Goletiani, N., Olson, D., Peltier, M., Renshaw, P. F., & Mello, N. K.  
482 (2013). Nicotine related brain activity: The influence of smoking history and blood nicotine levels, an  
483 exploratory study. *Drug and Alcohol Dependence*, 129(1-2), 137–144.  
484 doi:10.1016/j.drugalcdep.2012.10.002

485

486 **Supplementary Material**

487 **Methods**

488 A custom-built opto-electronic device was used to record the light output of the LED of the ENDS  
489 during the scanning tasks. This consisted of a 10 metre optical fibre cable, attached to a small rubber  
490 connector that allowed it to be fitted to the ENDS, in the scanner room. The cable passed through a  
491 waveguide into the control room, and terminated in a light-tight box next to a photo-sensitive  
492 resistor. Wired in parallel with the resistor was a 1.5V power source (an AA battery) and a BNC cable.  
493 This circuit produced a voltage on the resistor whenever the ENDS was activated by an inhalation,  
494 and this time-series signal was recorded via the BNC connection by a standard analogue-to-digital  
495 data recorder (AD Instruments Powerlab). In this way compliance with the cued smoking task could  
496 be assessed, and the recorded data in the naturalistic smoking task could be used to define  
497 idiosyncratic 'smoking' events for each subject.

498

499 **Results**

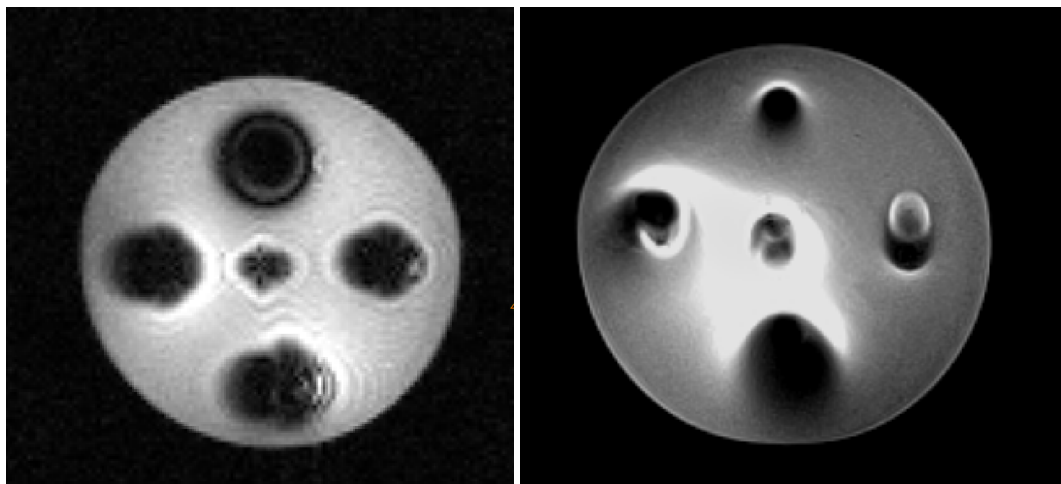

500

501 Figure S1. The five ENDS imaged with a gradient-echo sequence (left) shows characteristic dipole pattern  
502 disturbances from the different magnetic field susceptibilities found in the materials used to construct the  
503 varied ENDS. The same phantom images with a spin-echo sequence (right) removes the susceptibility-induced  
504 distortion and signal loss, but the RF field is compromised by the presence of conductors.

505

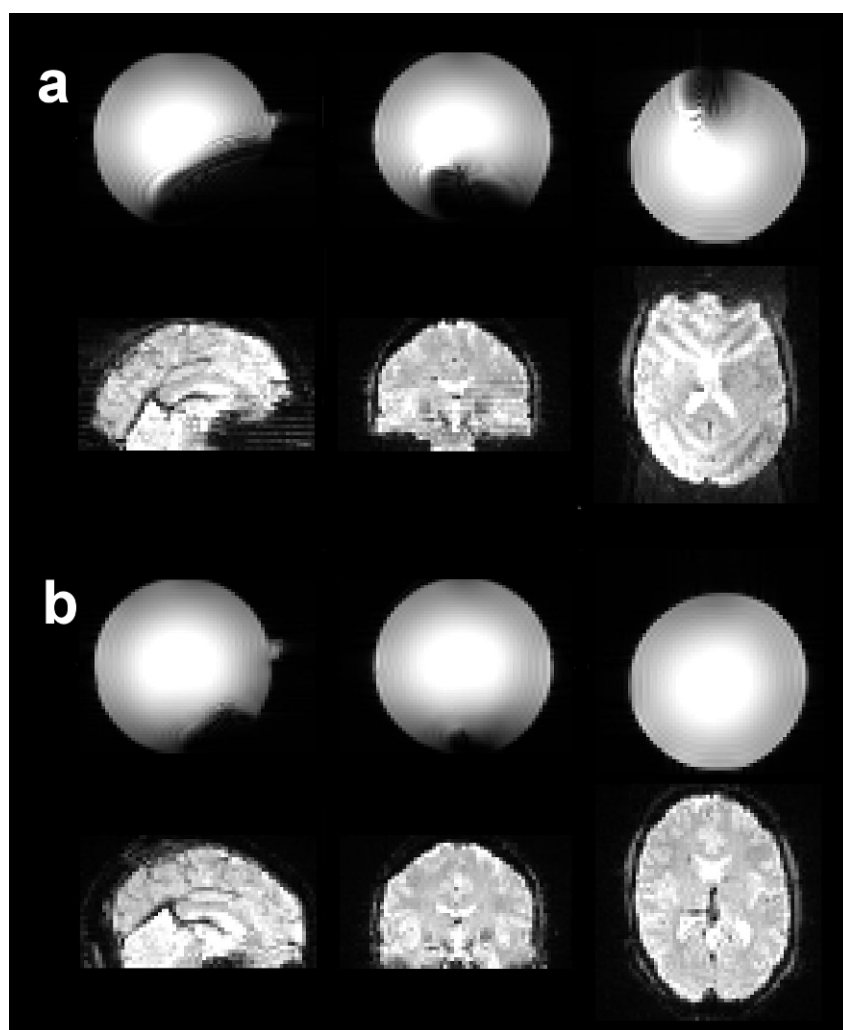

506

507 Figure S2. Results from initial testing of electronic cigarette products. a: An ENDS ('Puritane') with high  
508 magnetic susceptibility produces large regions of signal loss on a B0 magnitude image of an MRI phantom (top  
509 row). The same product also produces obvious artefacts on a BOLD EPI image when used by a human subject  
510 in the scanner (bottom row). b: A low magnetic susceptibility product ('Njoy') has much less effect on the B0  
511 phantom image, and produces no obvious artefacts on BOLD EPI images from a human subject during use.

512

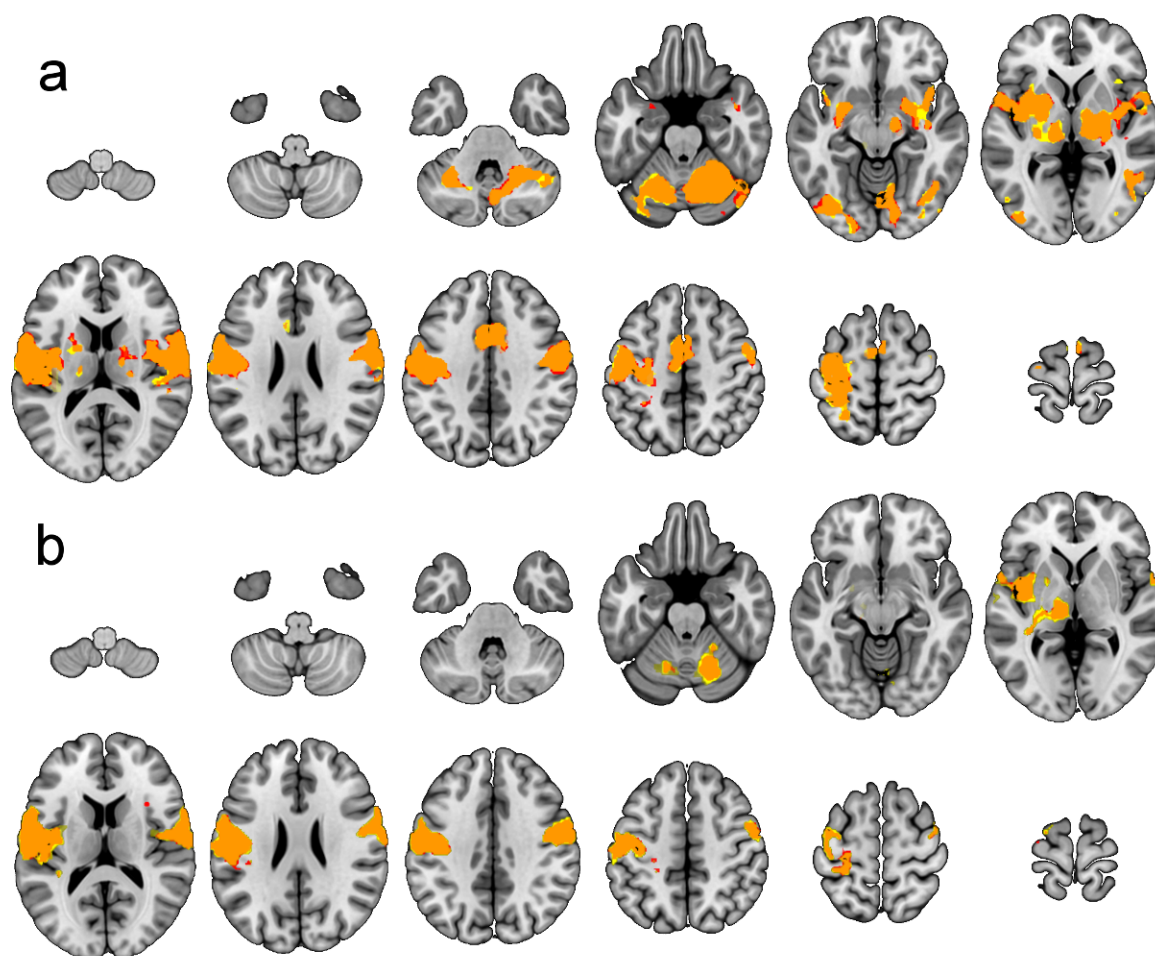

513

514 Figure S3. The effect of statistical modelling of physiological parameters (cardiac and respiratory effects) on  
515 the data from both experiments. Activation maps produced with no physiological modelling are shown in red,  
516 physiologically-corrected maps are shown in yellow, the overlap is in orange. a) Cued smoking experiment. b)  
517 Naturalistic smoking experiment. Effects of physiological noise modelling on the results are negligible,  
518 suggesting that these factors were not a significant confound in the data.

519
